# Supplementary material for: A simple and template free synthesis of branched ZnO nanoarchitectures for sensor applications
Source: Royal Society of Chemistry journal article supplement (doi:10.1039/c4ra09652e), 2014-01-01

# A Simple and Template Free Synthesis of Branched ZnO

## Nanoarchitectures for Sensor Applications

Ganesh Kumar Mani and John Bosco Balaguru Rayappan\*

Centre for Nano Technology & Advanced Biomaterials (CeNTAB) and

School of Electrical & Electronics Engineering (SEEE)

SASTRA University, Thanjavur 613 401, Tamil Nadu, India.

**Fig. S1:** Highlighted view of tiny nanoplatelets

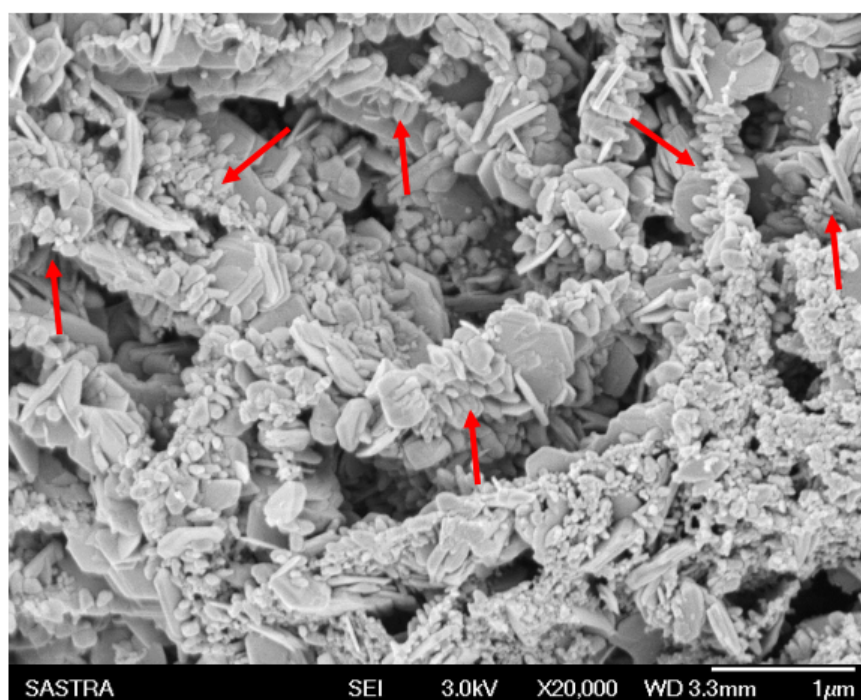

Fig. S2: Response and recovery times with respect to various concentrations

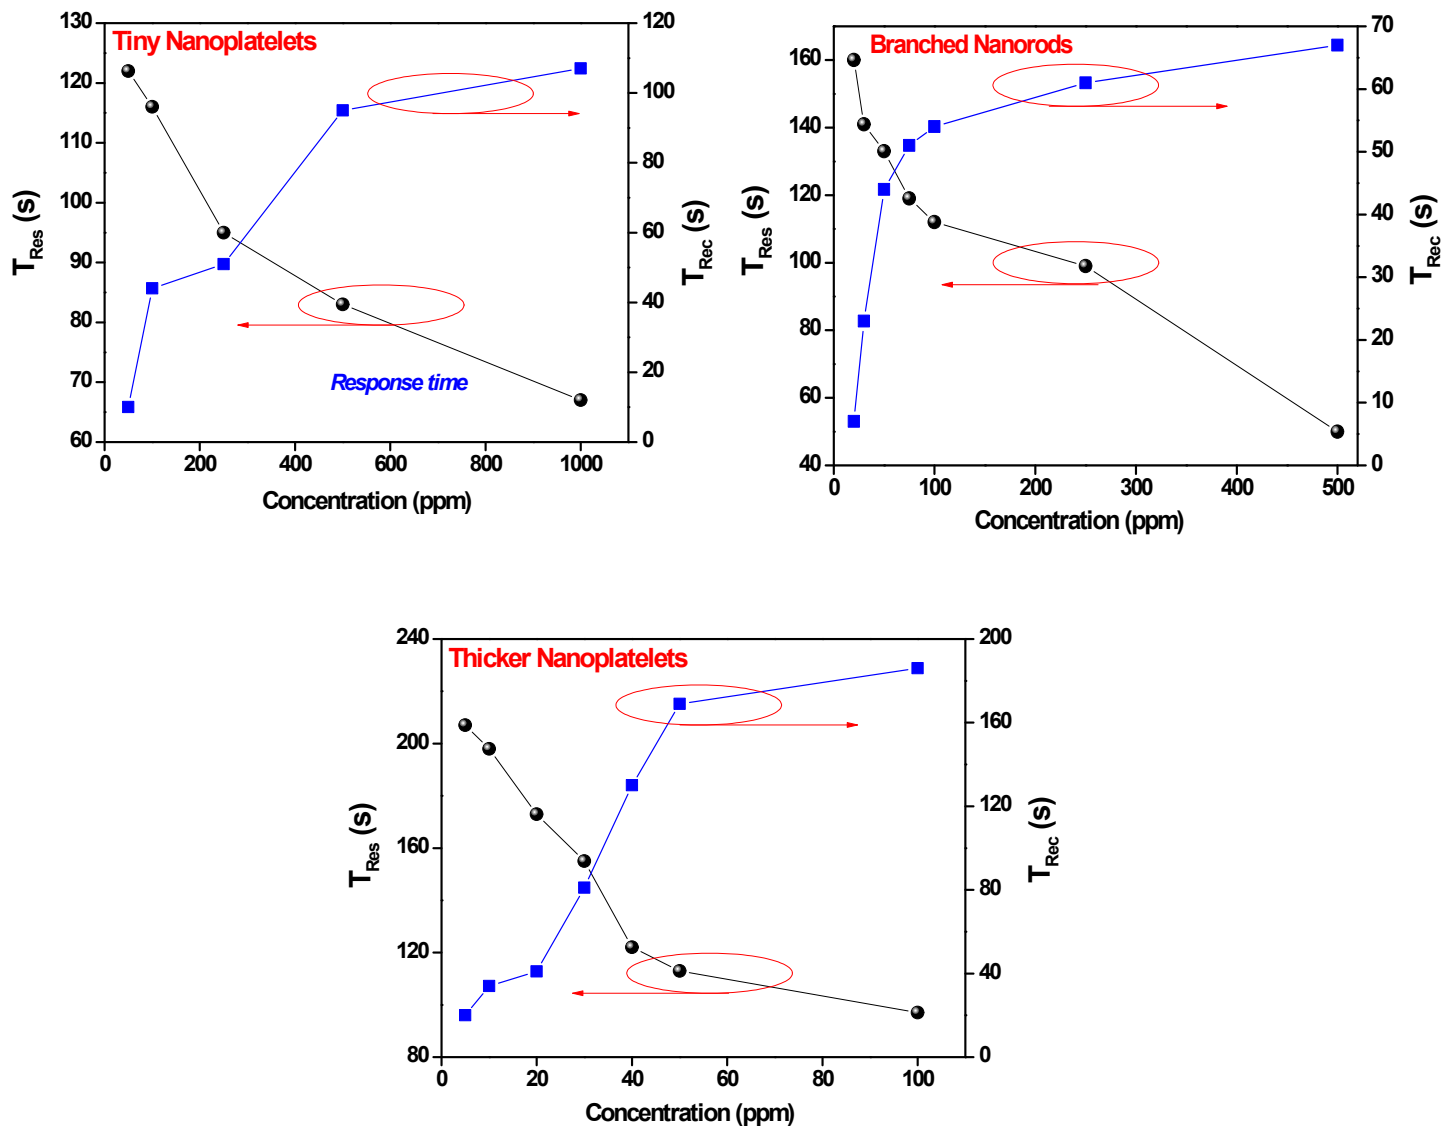

Supplement: c4ra09652e1.pdf [file c4ra09652e1.pdf]
